# Supplementary material for: Circulating antibody-secreting cells are a biomarker for early diagnosis in patients with Lyme disease
Source: PubMed Central journal article supplement (PMC10624293; doi:10.1371/journal.pone.0293203), 2023-11-03
Supplement: pone.0293203.s001.pdf [file pone.0293203.s001.pdf]

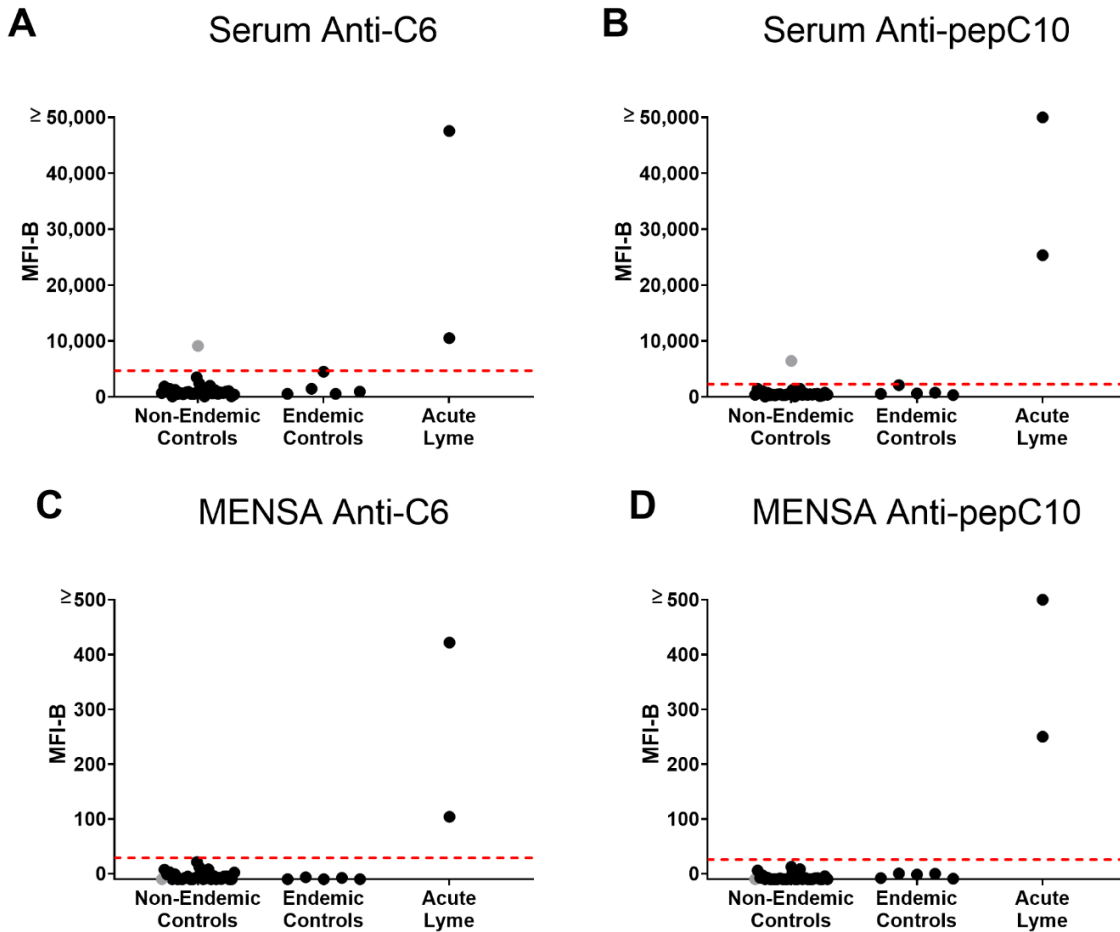

**S1 Fig. Antibodies specific for C6 and pepC10 are present in serum and MENSA samples from Newly Diagnosed Lyme Disease Patients and absent in samples from Control**

**subjects.** To determine clinical cut-off ( $C_0$ ) values, the MicroB-plex Anti-C6/anti-pepC10 Immunoassay was tested against samples collected from non-Lyme Controls who lived in Non-endemic ( $n=31$ ) and Endemic ( $n=5$ ) regions. Samples from two Newly Diagnosed Lyme Disease Patients were included as positive controls (Acute Lyme,  $n=2$ ).  $C_0$  values are indicated by dashed red lines. All samples were measured in duplicate and the mean value is displayed. A single "Control" serum sample was positive for both anti-C6 and anti-pepC10 and it exceeded the median value by greater than 10-fold; it was excluded from the calculation of the  $C_0$ , shown here as the single gray dot above the red dashed lines in A and B.
